# Supplementary material for: Selection and Characterization of Vimentin-Binding Aptamer Motifs for Ovarian Cancer
Source: MDPI journal article supplement (doi:10.3390/molecules26216525), 2021-10-28
Supplement: s1 [file s1]

## Supplementary Materials:

Table S1. Short binding motifs of V3 and V5.

| Name         | Sequences                                      |
|--------------|------------------------------------------------|
| V3M1 (29mer) | 5'-CGGATCGATAAGCTTCGATCATCGATCAC-3'            |
| V3M2 (40mer) | 5'-ACCTCTTCAAGAACATCCCTGTCACGGATCCTCTAGAGCA-3' |
| V3M3 (29mer) | 5'-CAAGAACATCCCTGTCACGGATCCTCTAG-3'            |
| V3M4 (22mer) | 5'-CGGATCGATAAGCTTCGATCAT-3'                   |
| V5M1(27mer)  | 5'-AAGCTTCGCATAGACCCAGCTGGTCCG-3'              |
| V5M2 (41mer) | 5'-TAGACCCAGCTGGTCCGGAATAAGATGTCACGGATCCTC-3'  |
| V5M3 (37mer) | 5'-AGCTTCGCATAGACCCAGCTGGTCCGGAATAAGAT-3'      |

Adenines that have monothioated phosphates are shown in red.
